# Supplementary material for: Hydration of biologically relevant tetramethylammonium cation by neutron scattering and molecular dynamics
Source: Royal Society of Chemistry journal article supplement (doi:10.1039/d3cp05449g), 2024-01-01
Supplement: d3cp05449g1.pdf [file d3cp05449g1.pdf]

DOI:10.1039/c9cp05682c

## ELECTRONIC SUPPLEMENTARY INFORMATION (ESI): Hydration of biologically relevant tetramethylammo- nium cation by neutron scattering and molecular dy- namics

Philip Mason<sup>\*a</sup>, Tomas Martinek<sup>a</sup>, Balázs Fábrián<sup>a‡</sup>, Mario Vazdar<sup>b</sup>, Pavel Jungwirth<sup>a</sup>,  
Ondrej Tichacek<sup>a</sup>, Elise Duboué-Dijon<sup>c</sup>, and Hector Martinez-Seara<sup>\*a</sup>

### 1 Additional details on neutron scattering

Measuring a total neutron scattering pattern for a solution yields an insight into the correlations between every atom in the system with every other atom in the system. While this is comprehensive, for most multi-atom systems it is too complex to interpret. Neutron scattering with isotopic substitution allows components of this to be isolated and examined separately. In the main body of the paper, we isolate the  $H_{\text{TMA}}-H_{\text{W}}$  component. However, other partial structure factors can be isolated from this experimental data. The most obvious to look at is the correlations between the  $H_{\text{TMA}}$  and all nuclei in the system that are not  $H_{\text{TMA}}$ . This is achieved by subtracting the  $H_{\text{TMA}}-H_{\text{W}}$  component from the first-order difference in the main body of the paper and is summarized in Eq. 1 in ESI. This is shown in real and reciprocal space in Fig. 1 in ESI. While a principal component of this function is the correlation between  $H_{\text{TMA}}$  and  $O_{\text{W}}$  on the solvating water, in practice it is very difficult to gain any useful insight from this function. This is because the intramolecular correlations between  $H_{\text{TMA}}$  and the other atoms on the TMA give very sharp peaks due to the molecular bonds. These very large peaks lie directly on top of the most interesting part of the solvation of the TMA ion in the 3–4 Å range.

$$\begin{aligned}\Delta S_{\text{H}_{\text{non}}}^{\text{Y}}(Q) &= 39.3 \cdot S_{\text{H}_{\text{TMA}}\text{O}}(Q) + 6.5 \cdot S_{\text{H}_{\text{TMA}}\text{C}}(Q) \\ &+ 2.3 \cdot S_{\text{H}_{\text{TMA}}\text{N}}(Q) + 2.3 \cdot S_{\text{H}_{\text{TMA}}\text{Cl}}(Q) \\ &+ 4.3 \cdot S_{\text{H}_{\text{TMA}}\text{H}_{\text{TMA}}}(Q) - 54.6\end{aligned}\tag{1}$$

where Y refers to every atom in the system but exchangeable hydrogen atoms. This equation can be Fourier transform to the real space as:

<sup>a</sup> Institute of Organic Chemistry and Biochemistry of the Czech Academy of Sciences, Flemingovo nám. 542, 160 00 Praha 6, Email: philip.mason@uochb.cas.cz, hseara@gmail.com

<sup>b</sup> Department of Mathematics, Informatics, and Cybernetics, University of Chemistry and Technology Prague, Technická 5, 16628 Prague, Czech Republic

<sup>c</sup> Laboratoire de Biochimie Théorique, CNRS, UPR 9080, Institut de Biologie Physico-Chimique, 13 rue Pierre et Marie Curie, 75005 Paris, France

<sup>‡</sup> Present address: Department of Theoretical Biophysics, Max Planck Institute of Biophysics, Max-von-Laue Straße 3, 60438 Frankfurt am Main, Germany

$$\begin{aligned}
\Delta G_{H_{\text{non}}}^Y(r) = & 39.3 \cdot g_{\text{H}_{\text{TMA}}\text{O}}(r) + 6.5 \cdot g_{\text{H}_{\text{TMA}}\text{C}}(r) \\
& + 2.3 \cdot g_{\text{H}_{\text{TMA}}\text{N}}(r) + 2.3 \cdot g_{\text{H}_{\text{TMA}}\text{Cl}}(r) \\
& + 4.3 \cdot g_{\text{H}_{\text{TMA}}\text{H}_{\text{TMA}}}(r) - 54.6.
\end{aligned}
\tag{2}$$

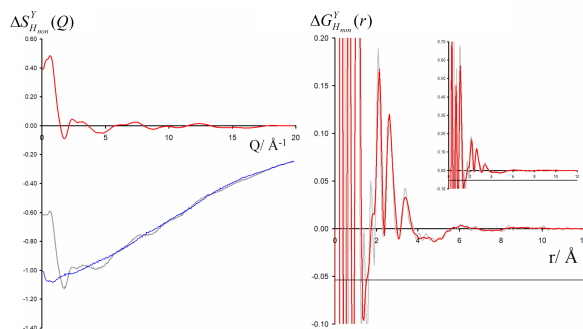

**Fig. 1** Left in grey is the raw function  $\Delta S_{H_{\text{non}}}^Y(Q)$ . In the right, in grey is the direct Fourier transform of this function,  $\Delta G_{H_{\text{non}}}^Y(r)$ . The function  $\Delta S_{H_{\text{non}}}^Y(Q)$  after background subtraction and smoothing is shown in red. In the right, in red is its direct Fourier transform  $\Delta G_{H_{\text{non}}}^Y(r)$ . As the  $\text{H}_{\text{TMA}}\text{-C}$  intramolecular peak of the TMA at 1.1 Å is not very interesting in  $\Delta G_{H_{\text{non}}}^Y(r)$  and dwarfs everything else in this function, this is only shown in the inset.

## 2 Extra data AIMD

Contrary to all tested force fields, the AIMD simulation captures the shoulder in the experimental signal at low  $r$ . However, the box is too small to assess the signal quality at the position of the main peak and beyond. Still, the small size of the box may affect the RDF. The reasonable agreement with the experimental signal is obtained despite the AIMD simulation not containing any chloride counterion.

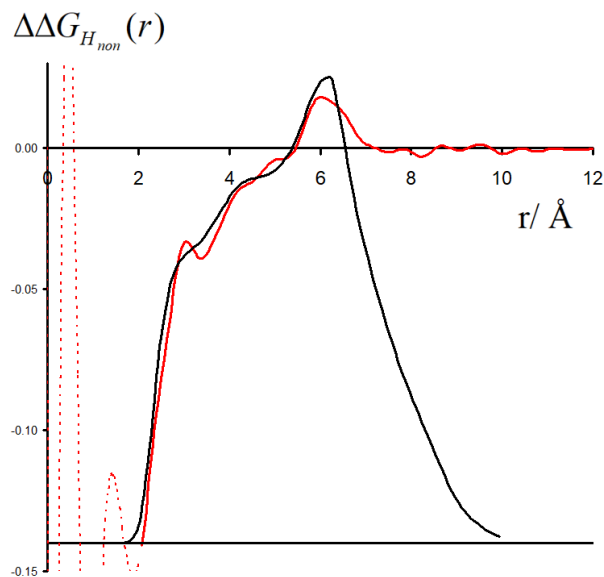

**Fig. 2** Experimental Fourier-transformed signal  $\Delta\Delta G_{H_{\text{non}}}(r)$  (red), together with the same  $\Delta\Delta G_{H_{\text{non}}}(r)$  obtained from AIMD simulations (black).
